# Supplementary material for: Photoinduced cleaning of water-soluble dyes on patterned superhydrophilic/superhydrophobic substrates
Source: Royal Society of Chemistry journal article supplement (doi:10.1039/b9nr00055k), 2009-09-30

Supplementary material (ESI) for *Nanoscale*

Supporting information for:

## Photoinduced Cleaning of Patterned Superhydrophilic/Superhydrophobic Substrates

Xuemin Zhang<sup>a</sup>, Junhu Zhang<sup>\*a</sup>, Zhiyu Ren<sup>b</sup>, Xun Zhang<sup>a</sup>, Tian Tian<sup>a</sup>, Yunan Wang<sup>a</sup>,  
Fengxia Dong<sup>a</sup>, and Bai Yang<sup>a</sup>

<sup>a</sup> *State Key Lab of Supramolecular Structure and Materials, College of Chemistry,  
Jilin University, Changchun, People's Republic of China*

<sup>b</sup> *Key Laboratory of Functional Inorganic Material Chemistry, Ministry of Education,  
Laboratory of Physical Chemistry, School of Chemistry and Materials Science,  
Heilongjiang University, Harbin 150080, P. R. China*

### Experimental

**Fabrication of SCAs modified with PFS:** SCAs on silicon substrate were fabricated using reactive ion etching (RIE) with two dimensional silica colloidal crystals of ~1115 nm as masks. And RIE was performed by Plasmalab 80 Plus (Oxford Instrument) with a gas mixture of CHF<sub>3</sub> at 30 sccm and SF<sub>6</sub> at 4 sccm. Total gas pressure was 5 mTorr, and the RF power and the ICP power were 100 W and 500 W, respectively. The etching duration was 210 s at a temperature of 10 °C. Modification of PFS was carried out using chemical vapor deposition by putting the substrate in a sealed vessel full of PFS vapor for 2 hours at 80 °C. The obtained PFS coating were relatively stable after the substrate was placed in air for at least 3 months.

## Supporting Figures

**Figure S1:** SEM image of obtained TNCs not well patterned.

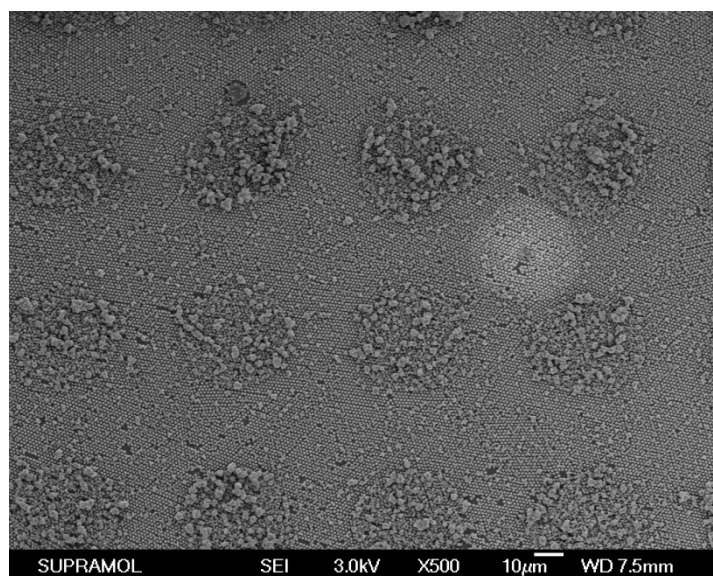

Supplement: b9nr00055k.pdf [file b9nr00055k.pdf]
